# Supplementary material for: Binary ionic liquids hybrid electrolyte based supercapacitors with high energy & power density
Source: Royal Society of Chemistry journal article supplement (doi:10.1039/d3ra01634j), 2023-01-01
Supplement: d3ra01634j1.pdf [file d3ra01634j1.pdf]

## Binary ionic liquid hybrid electrolyte based supercapacitors with high energy & power density

Zheng Bo<sup>1</sup>, Xu Zhang<sup>1</sup>, Zhesong Huang<sup>1</sup>, Yuhui Huang<sup>2,3</sup>, Jianhua Yan<sup>1</sup>, Kefa Cen<sup>1</sup> and Huachao Yang<sup>1,3\*</sup>

<sup>1</sup>State Key Laboratory of Clean Energy Utilization, Institute for Thermal Power Engineering, College of Energy Engineering, Zhejiang University, Hangzhou 310027, Zhejiang, China.

<sup>2</sup>College of Materials Science and Engineering, Zhejiang University, Hangzhou, 310027, Zhejiang, China.

<sup>3</sup>Research Institute of Zhejiang University-Taizhou, Taizhou, Zhejiang Province 318000, China.

E-mail: [huachao@zju.edu.cn](mailto:huachao@zju.edu.cn)

### Supplementary section

Table S1 display the results of replicate experiments in working voltage tests. As shown in the Table S1, the coulombic efficiency of 1M [TMPA]<sub>0.5</sub>[Pyr<sub>14</sub>]<sub>0.5</sub>[TFSI]/ACN decreases below 95% when the applied voltage is over 3.1 V.

**Table S1** Coulombic efficiency of 1 M [TMPA]<sub>0.5</sub>[Pyr<sub>14</sub>]<sub>0.5</sub>[TFSI]/ACN in different voltage window (the scan rate is 20 mV S<sup>-1</sup>)

| Voltage window (V) | Coulombic efficiency (%) |         |         |
|--------------------|--------------------------|---------|---------|
|                    | Group 1                  | Group 2 | Group 3 |
| 0 - 2.7            | 99.51                    | 98.94   | 99.49   |
| 0 - 2.9            | 98.89                    | 98.85   | 98.83   |
| 0 - 3.1            | 97.70                    | 97.66   | 97.67   |
| 0 - 3.3            | 94.79                    | 94.86   | 94.43   |
| 0 - 3.5            | 94.32                    | 94.49   | 94.27   |

In order to calculate the theoretical value of operating voltage of 1 M [TMPA]<sub>0.5</sub>[Pyr<sub>14</sub>]<sub>0.5</sub>[TFSI]/ACN, LSV tests were performed at the scan rate of 42 μV s<sup>-1</sup> in a three-electrode system in negative range (from 0 to -3 V) and positive range (from 0 to 3 V), respectively.<sup>1</sup> In the three-electrode system, the working electrode and counter electrode were activated carbon with a diameter of 8 mm, and a silver wire was used as pseudo-reference electrode.

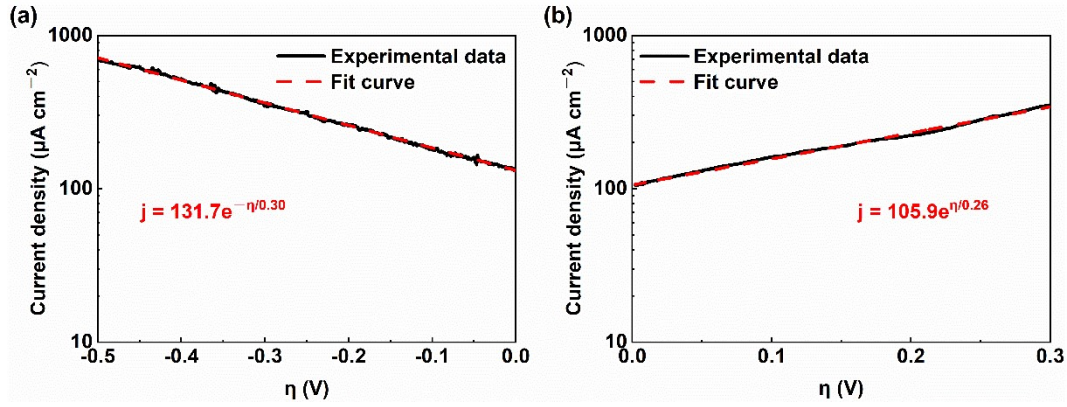

**Fig. S1** (a) cathodic and (b) anodic Tafel plots (linear regions – i.e., where the current density varies exponentially with the overpotential) for 1 M [TMPA]<sub>0.5</sub>[Pyr<sub>14</sub>]<sub>0.5</sub>[TFSI]/ACN. In (a),  $\eta$  is the difference between the applied potential and  $-1.6$  V and in (b),  $\eta$  is the difference between the applied potential and  $1.2$  V.

As shown in Fig. S1, the Tafel curves show that the current density increases exponentially with the overpotential. Therefore, the current density can be modelled with the equation below,

$$j = j_0 e^{\eta/\beta} \quad (9)$$

where  $j$  and  $j_0$  are, respectively, the current density and the exchange current density;  $\beta$  is the Tafel coefficient and  $\eta$  is the overpotential at which the anodic/cathodic reaction is taking place. And the operational voltage  $\Delta V_{max}$  can be calculated by the equation below,

$$\Delta V_{max} = \Delta V_0 + \frac{\beta_a}{\log e} \log\left(\frac{j_{max}}{j_{0,a}}\right) + \frac{\beta_c}{\log e} \log\left(\frac{j_{max}}{j_{0,c}}\right) \quad (10)$$

where  $\Delta V_0$  is the theoretical cell voltage at equilibrium;  $j_{max}$  is the maximum current density considered acceptable (which will be the same for the positive and negative electrodes, unless they have different areas or mass loadings);  $j_{0,a}$  and  $j_{0,c}$  are, respectively, the exchange current density for the anodic and for the cathodic parasitic reactions; and  $\beta_a$  and  $\beta_c$  are, respectively, the Tafel coefficients for the anodic and for the cathodic parasitic reactions.

Because the BILs electrolyte is non-aqueous system, the acceptable parasitic current is selected as  $0.2 \text{ mA cm}^{-2}$ , and the theoretical value of maximum working voltage is  $3.1 \text{ V}$ , which is consistent with the results of working voltage test.

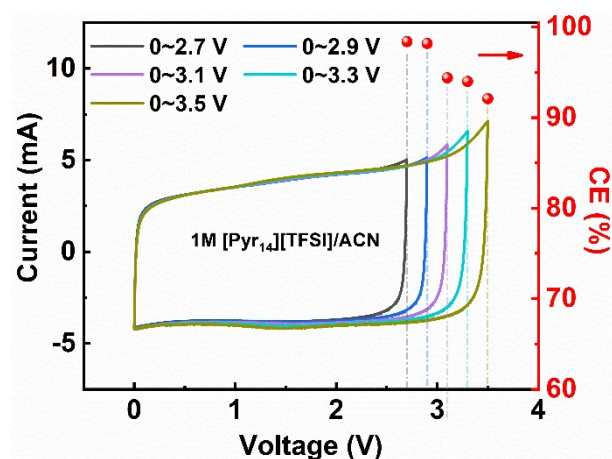

**Fig. S2** CV curves and coulombic efficiency of 1 M [Pyr<sub>14</sub>][TFSI]/ACN at 20 mV s<sup>-1</sup>.

As shown in Fig. S2, the device using 1 M [Pyr<sub>14</sub>][TFSI]/ACN displays a coulombic efficiency lower than 95% when the operation voltage is over 3.1 V.

## References in Supplementary

- 1 J. M. Baptista, G. Gaspar, K. G. U. Wijayantha and K. Lobato, *J. Energy Storage*, 2022, **52**, 104927.
